# Supplementary material for: Self-templating construction of mesopores on three-dimensionally ordered macroporous La0.5Sr0.5MnO3 perovskite with enhanced performance for soot combustion
Source: Royal Society of Chemistry journal article supplement (doi:10.1039/c9cy00096h), 2019-01-01
Supplement: c9cy00096h1.pdf [file c9cy00096h1.pdf]

Electronic supplementary information for

**Self-templating construction of mesopores on three-dimensionally  
ordered macroporous  $\text{La}_{0.5}\text{Sr}_{0.5}\text{MnO}_3$  perovskite with enhanced  
performance for soot combustion**

Peng Zhao, Fan Fang, Nengjie Feng\*, Chong Chen, Geng Liu, Li Chen, Zhongjian Zhu,  
Jie Meng, Hui Wan and Guofeng Guan\*

*State Key Laboratory of Materials-Oriented Chemical Engineering, College of  
Chemical Engineering, Jiangsu National Synergetic Innovation Center for Advanced  
Materials, Jiangsu Collaborative Innovation Center for Advanced Inorganic Function  
Composites, Nanjing Tech University, Nanjing 210009, P.R. China*

*\*Corresponding author:*

*Nengjie Feng, E-mail address: fengnengjie@njtech.edu.cn Tel: +86 25 83587198*

*Guofeng Guan, E-mail address: guangf@njtech.edu.cn Tel: +86 25 83587198*

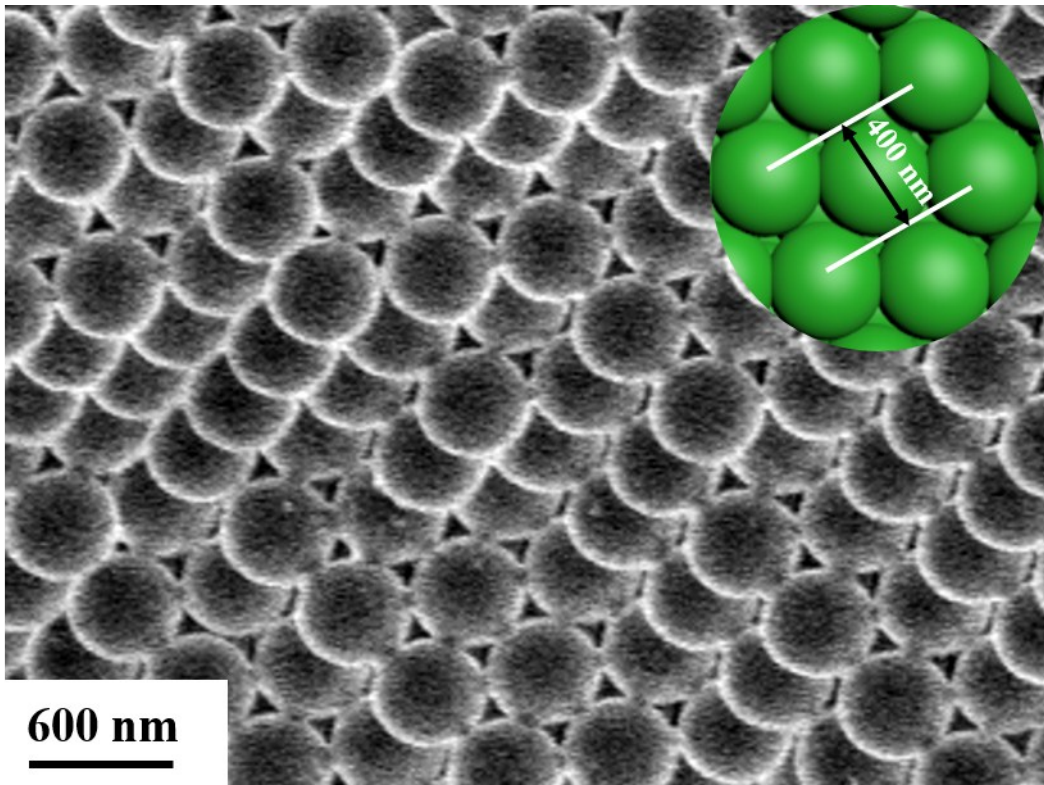

**Fig. S1** FESEM images of as-prepared well-packed PMMA microspheres.

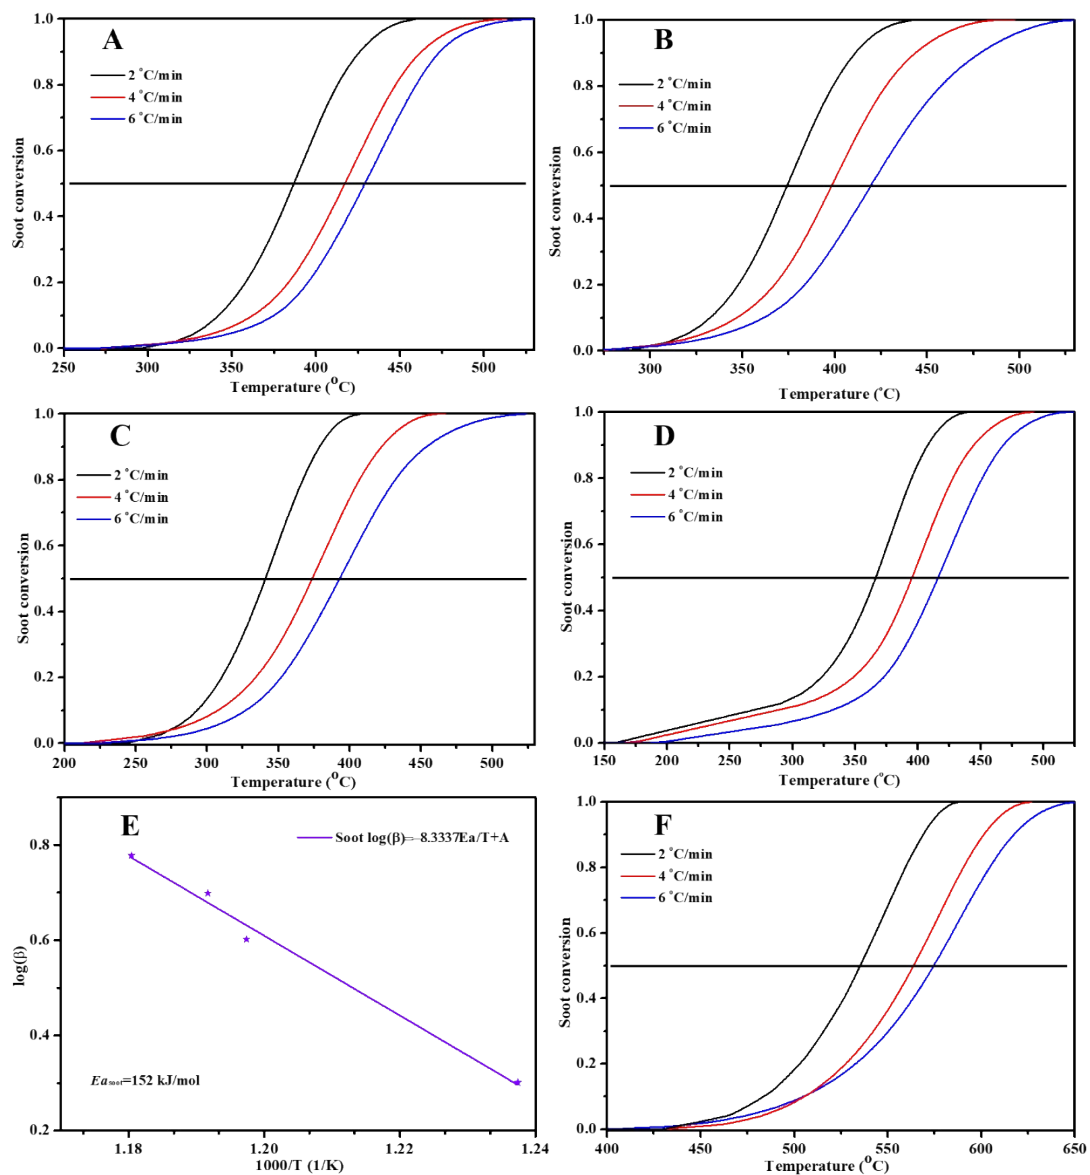

**Fig. S2** Detail data of Ozawa method: (A) LSM-0; (B) LSM-1; (C) LSM-3; (D) LSM-5; (E) and (F) pure soot.
